# Supplementary figures and images for: Adapting a Complex Health Intervention Guided by the Core Functions and Form Model: A Methodology and Case Example of Participatory Adaptation
Source: Research Square preprint supplement (doi:10.21203/rs.3.rs-9587581/v1), 2026-06-05

Appendix Figure 1.


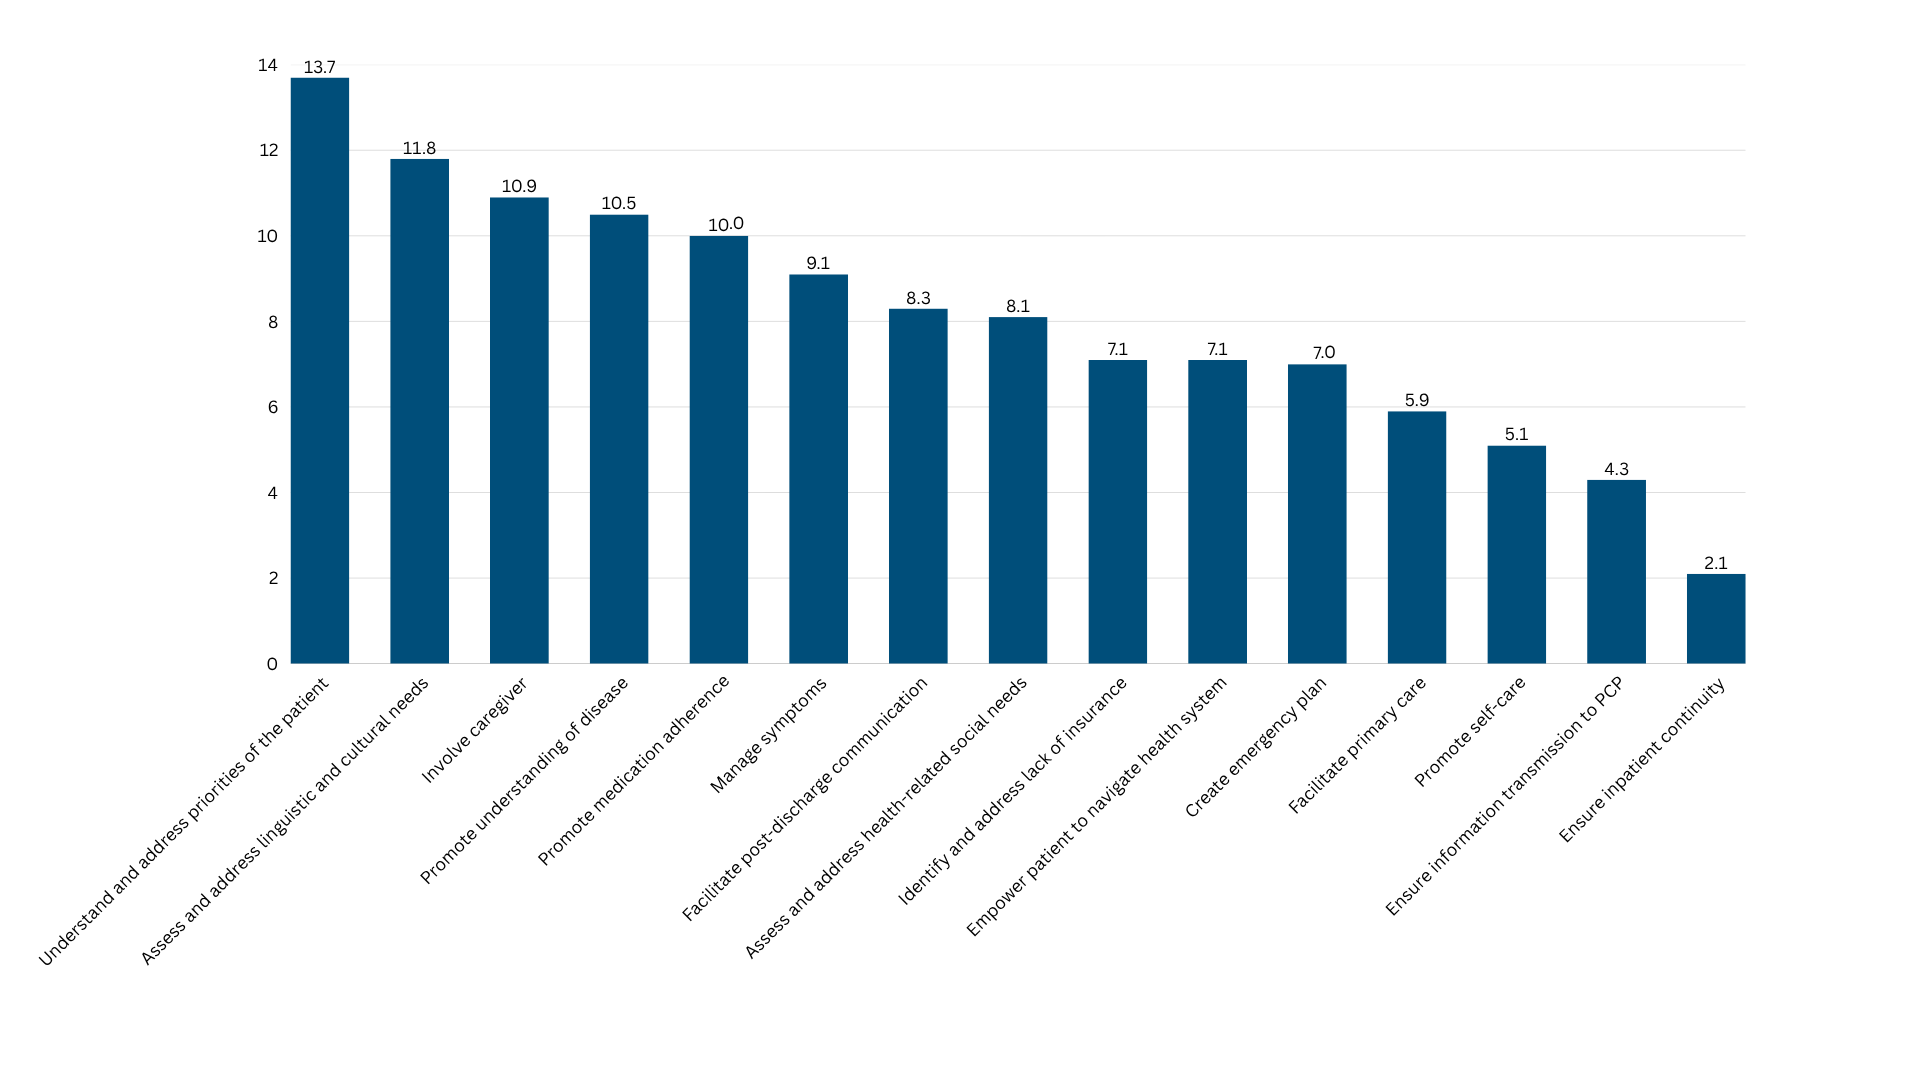

Supplement: Supplementary file 1 [file d7eda081fb1befe050516c52.docx]
